# Supplementary material
Source: Springer Nature journal article supplement (https://www.springermedizin.de/resource/supplementary/12936_2013_2750_MOESM2_ESM.pdf/9544188)

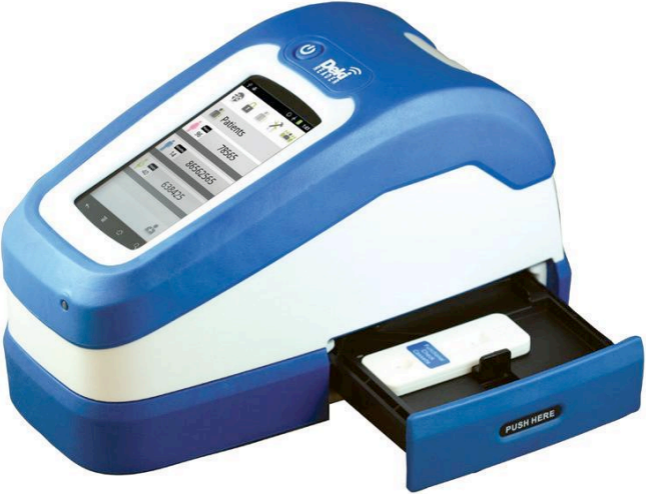

Power  
PalmSecure

Patients  
78365  
86562365  
638425

PUSH HERE

Supplement: MOESM2 [file 9544188]
